# Pulmonary aspiration during procedural sedation: a comprehensive systematic review

S. M. Green<sup>1,\*</sup>, K. P. Mason<sup>2</sup> and B. S. Krauss<sup>3</sup>

<sup>1</sup>Department of Emergency Medicine, Loma Linda University Medical Center and Children's Hospital, Loma Linda, CA, USA, <sup>2</sup>Department of Anesthesia, Harvard Medical School, Boston Children's Hospital, Boston, MA, USA and <sup>3</sup>Division of Emergency Medicine, Boston Children's Hospital and the Department of Pediatrics, Harvard Medical School, Boston, MA, USA

\*Corresponding author. E-mail: [steve@stevegreenmd.com](mailto:steve@stevegreenmd.com)

## Abstract

**Background.** Although pulmonary aspiration complicating operative general anaesthesia has been extensively studied, little is known regarding aspiration during procedural sedation.

**Methods.** We performed a comprehensive, systematic review to identify and catalogue published instances of aspiration involving procedural sedation in patients of all ages. We sought to report descriptively the circumstances, nature, and outcomes of these events.

**Results.** Of 1249 records identified by our search, we found 35 articles describing one or more occurrences of pulmonary aspiration during procedural sedation. Of the 292 occurrences during gastrointestinal endoscopy, there were eight deaths. Of the 34 unique occurrences for procedures other than endoscopy, there was a single death in a moribund patient, full recovery in 31, and unknown recovery status in two. We found no occurrences of aspiration in non-fasted patients receiving procedures other than endoscopy.

**Conclusions.** This first systematic review of pulmonary aspiration during procedural sedation identified few occurrences outside of gastrointestinal endoscopy, with full recovery typical. Although diligent caution remains warranted, our data indicate that aspiration during procedural sedation appears rare, idiosyncratic, and typically benign.

**Key words:** adverse events; pulmonary aspiration; propofol; sedation

Procedural sedation is widely performed in patients of all ages to facilitate procedures that include dental extraction, endoscopy, bronchoscopy, fracture reduction, abscess drainage, laceration repair, bone marrow aspiration, arthrocentesis, and radiological and cardiac imaging.<sup>1–8</sup> Pulmonary aspiration is a rare but potentially life-threatening complication of sedation, avoidance of which is the goal of preprocedural fasting guidelines. Although aspiration complicating general anaesthesia in theatre has been extensively studied,<sup>9–18</sup> there are few publications regarding aspiration during procedural sedation.<sup>8 19 20</sup> The existing literature comprises occasional case reports and rare

mentions in retrospective sedation audits, most of which are related to gastrointestinal endoscopy.

Past and present strategies to avoid aspiration during procedural sedation have by default paralleled those traditionally advocated for theatre, including the specification of nil by mouth (NBM) guidelines.<sup>1–15 19 20</sup> If the circumstances, nature, and outcomes of aspiration during procedural sedation do not parallel conditions associated with aspiration during general anaesthesia, then modification of aspiration strategies (prophylaxis, management, and treatment) may be warranted.<sup>19 20</sup>

We therefore performed a comprehensive, systematic review designed to identify and catalogue all published instances of aspiration during procedural sedation, including gastrointestinal endoscopy but focusing in particular on other settings. Our objective was to detail the circumstances, nature, and outcomes of these events, search for similarities, and then contrast them to the features reported for theatre-related aspiration.

## Methods

We performed this review in accordance with the MOOSE guidelines for systematic reviews of observational data.<sup>21</sup> This study was registered with the International Prospective Register of Systematic Reviews (PROSPERO; [www.crd.york.ac.uk/PROSPERO/](http://www.crd.york.ac.uk/PROSPERO/)), registration number: CRD42016039039. This analysis was exempt from institutional ethics committee review.

Our medical librarian conducted a search of PubMed, Web of Science, and the Cochrane Library from January 1985 to May 10, 2016, limited to human subjects and the English language. Our specific search strategy in PubMed was as follows: (sedation[tiab] OR "monitored anaesthesia care"[tiab]) AND aspiration[All Fields] AND "humans"[MeSH Terms]. For the other two sources, was the search strategy was as follows: (sedation OR "monitored anaesthesia care") AND aspiration.

We screened titles and abstracts of all articles identified by the search, with full-text review of reports including trials, case series, and case reports of patients receiving procedural sedation. We reviewed the reference lists of identified publications and consulted with topic experts to identify additional reports.

We separately searched the sequential publications of the ASA Closed Claims Database, and searched for applicable closed claims analyses from other locations and specialties.

We searched to identify reports that described one or more specific occurrences of pulmonary aspiration associated with procedural sedation. We defined procedural sedation as 'the use of anxiolytic, sedative, analgesic, or dissociative drugs to attenuate pain, anxiety, and motion to facilitate the performance of a necessary diagnostic or therapeutic procedure, provide an appropriate degree of amnesia or decreased awareness, and ensure patient safety'.<sup>12</sup> We included only procedural sedation performed outside of the operating theatre using natural airways (i.e. no tracheal intubation or laryngeal mask airway support).

Pulmonary aspiration is defined as 'inhalation of oropharyngeal or gastric contents into the larynx and lower respiratory tract',<sup>14</sup> with aspiration pneumonitis defined as an 'event where emesis was noted or food material was found in the oral/pharyngeal cavity—associated with any of the following: new cough, wheeze, increase in respiratory effort, change in chest radiograph indicative of aspiration, or new need for oxygen therapy after recovery from sedation'.<sup>8</sup>

Gastrointestinal endoscopy procedures were evaluated separately, because they are distinct from other procedural sedation in that they involve manipulation and stimulation of the airway/oral cavity. For pulmonary aspiration during gastrointestinal endoscopy, we summarized the information provided regarding aggregate instances described in each report. We pursued greater detail for aspiration during other procedures, extracting—when available—information about the patient (age, co-morbidities, aspiration risk factors, ASA physical status, and fasting), procedure (type, provider, and primary sedative), aspiration event (nature, timing, and presence of pneumonitis), interventions (admission and intubation), and outcomes (death

and neurological disability). We also noted when such information was missing or ambiguous and contacted the authors of the reports to request clarification.

## Results

Our search and screening process (Fig. 1)<sup>22</sup> identified 35 articles describing one or more occurrences of pulmonary aspiration during procedural sedation.

Our search of the sequential publications of the ASA Closed Claims Database yielded numerous occurrences of aspiration associated with general anaesthesia. The single potentially qualifying instance for the present study was that of a morbidly obese patient who aspirated during 'non-operating room anaesthesia';<sup>23</sup> however, it was not specified whether his or her preplanned management was a natural airway or tracheal intubation. No further details were provided, including procedure, age, outcome, and the anaesthetic or sedative agents used.<sup>23</sup> An analysis from this closed claims database focused specifically on monitored anaesthesia care did not include any instances of aspiration.<sup>24</sup>

An anaesthesia closed claims analysis of the UK National Health Service described no occurrences of aspiration associated with procedural sedation.<sup>25</sup> Major closed claims databases do not exist for dentistry, intensive care medicine, paediatrics, or emergency medicine; however, three limited close claims analyses (one dental and two emergency medicine)<sup>26–28</sup> do not include occurrences of aspiration during procedural sedation.

Our search identified 292 occurrences of aspiration during gastrointestinal endoscopy described in 22 different reports (Fig. 2).<sup>29–44</sup> Most of the identified instances were in adult patients who had substantial underlying illness, with propofol as the principal sedative. The eight deaths resulted from procedures performed for percutaneous endoscopic gastrostomy tube placement ( $n=4$ ), active gastrointestinal bleeding ( $n=3$ ), or endoscopic submucosal dissection ( $n=1$ ).

For procedures other than endoscopy, we identified 34 unique occurrences of aspiration in 17 different reports (Fig. 1).<sup>7 8 34 39 52–62</sup> For additional details, we contacted 16 of these authors with our questions, with 14 providing clarifications. Aspiration during non-endoscopic procedures was more frequently identified in children overall (Table 1), but adults dominated the more serious instances. A variety of indications and providers were represented, with propofol as the most common sedative.

The single death identified for non-endoscopic procedures was in an adult with advanced cancer and substantial underlying illness who underwent colonoscopy, and aspirated despite low sedative doses (midazolam 1 mg plus fentanyl 25 µg). He did not receive aggressive intervention for ensuing respiratory failure. There were no reports of permanent neurological disability. Four other patients required intubation but ultimately recovered; none was ASA physical status I. There were 29 other patients who did not require intubation, including many apparently with minimal symptoms (Table 1).

## Discussion

We report the first systematic review of aspiration in procedural sedation and descriptively review this largest available sampling, contrasting these events with what is known about procedural sedation practice and with what is known about aspiration during general anaesthesia. However, a review of this

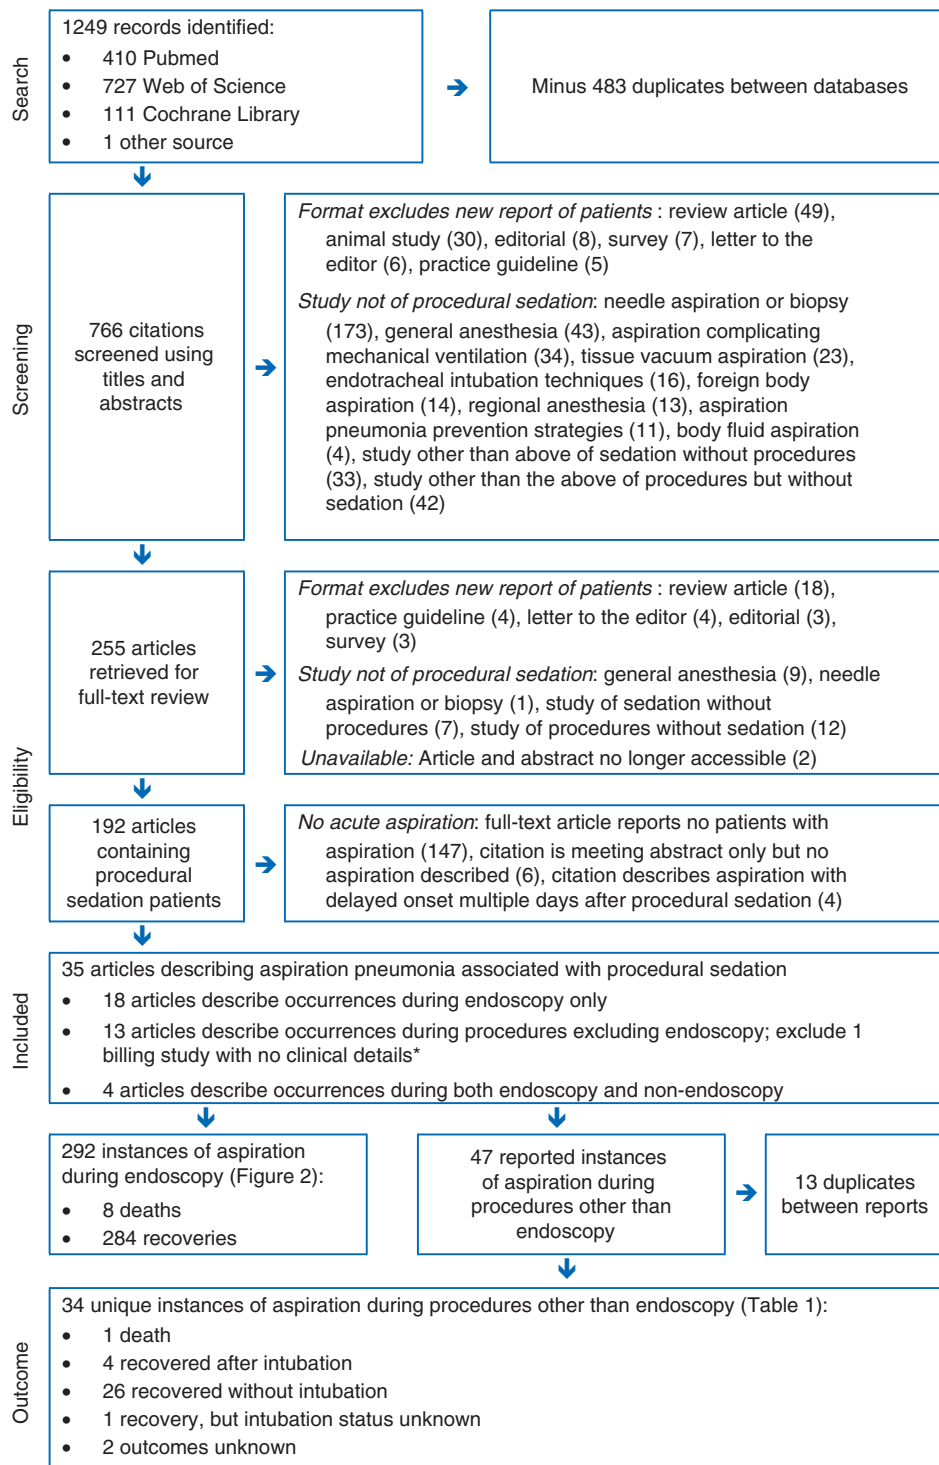

Fig 1 Flow diagram of study selection process. \*This study<sup>22</sup> was a search of a Medicare billing database that identified 173 occurrences of 'aspiration pneumonia' billing code within 30 days after colonoscopy; no clinical details are available.

Reports including Deaths Resulting From Aspiration:

- Ayres and colleagues (2014):<sup>29</sup> 13 adults aspirated during either midazolam or general anesthesia-facilitated PEG tube placement; 4 resulting deaths.
- Barbara and colleagues 2015:<sup>30</sup> A 50-yr-old ICU patient aspirated during fentanyl and midazolam facilitated endoscopy for active GI bleeding and suffered cardiac arrest; despite resuscitation he died shortly thereafter of multi-organ failure.
- Kawanishi and colleagues 2016:<sup>31</sup> 24 adults aspirated during diazepam-facilitated endoscopy for active GI bleeding; 3 were intubated and 1 died.
- Park and colleagues 2013:<sup>32</sup> 38 adults aspirated during propofol or midazolam-facilitated endoscopic submucosal dissection; 1 death.
- Sakai and colleagues 2006:<sup>33</sup> an 82-yr-old ASA IV patient with underlying cirrhosis, ascites, and coronary artery disease status post coronary artery bypass grafting underwent endoscopy for GI bleeding after fasting 8 h. An anaesthetist provided propofol  $75 \mu\text{g kg}^{-1} \text{min}^{-1}$  mcg/kg/min. The patient aspirated and was intubated, developed pneumonia and ARDS and later died. Three other older adults with major underlying medical problems recovered after aspiration pneumonia complicating endoscopy facilitated by anaesthetist-administered propofol infusions. two of these three were intubated.

Reports of aspiration without death:

- Agostoni and colleagues 2011:<sup>34</sup> 13 adults aspirated during propofol-facilitated endoscopy for various indications; no mention of death or outcome other than recovery.
- Beach and colleagues 2016:<sup>8</sup> A 3-yr-old status post visceral transplant aspirated during propofol and ketamine-facilitated endoscopy and required intubation. A 21-month-old with gastric reflux aspirated during propofol-facilitated endoscopy but did not require intubation. both recovered.
- Bosanko and colleagues 2010:<sup>35</sup> 11 adults aspirated during midazolam-facilitated PEG tube placement; no mention of death or outcome other than recovery.
- Byeon and colleagues 2012:<sup>36</sup> 2 adults aspirated during propofol-facilitated double-balloon enteroscopy; both recovered.
- Friedrich and colleagues 2014:<sup>37</sup> 29 adults aspirated during propofol-facilitated endoscopy for various indications; none was hospitalized and all recovered.
- Hsieh and colleagues 2011:<sup>38</sup> 5 adults (3 asymptomatic) developed radiographic aspiration during propofol or midazolam-facilitated endoscopy for unknown indications; no mention of death or outcome other than recovery.
- Kamat and colleagues 2014:<sup>39</sup> 3 children aged 21 months, 36 months, and 11 years aspirated during propofol-facilitated endoscopy for unspecified indications; 1 was intubated but all recovered.
- Mao and colleagues 2014:<sup>40</sup> 17 adults aspirated during propofol-facilitated endoscopy for various indications; no mention of death or outcome other than recovery.
- Nayar and colleagues 2010:<sup>41</sup> A 73-yr-old patient aspirated during propofol-facilitated endoscopy for oesophageal cancer staging; she was hospitalized without intubation and recovered.
- Park and colleagues 2013:<sup>42</sup> 32 adults aspirated during propofol or midazolam-facilitated endoscopic submucosal dissection; no deaths.
- Park and colleagues 2014:<sup>43</sup> 9 adults aspirated during propofol and remifentanyl-facilitated endoscopic submucosal dissection; no deaths.
- Prout and Metreweli (1972):<sup>44</sup> 16 adults aspirated during diazepam-facilitated endoscopy for unspecified indications; all recovered.
- Tanaka 2007:<sup>45</sup> 2 adults aspirated during pethidine and flunitrazepam-facilitated double-balloon enteroscopy; both recovered.
- Thapa and Mehta (1990):<sup>46</sup> 2 children with aspirated during diazepam-facilitated endoscopy for active variceal bleeding; both recovered.
- Tohda and colleagues 2006:<sup>47</sup> 4 adults aspirated during propofol-facilitated endoscopy for active GI bleeding and were hospitalized; no mention of death or outcome other than recovery.
- Tohda and colleagues 2006:<sup>48</sup> 2 adults aspirated during propofol-facilitated endoscopy for active GI bleeding and were hospitalized; both recovered.
- Walker (2003):<sup>49</sup> 1 adult aspirated during propofol-facilitated endoscopy and required hospitalization.
- Yoo and colleagues 2015:<sup>50</sup> 10 adults aspirated during propofol and remifentanyl-facilitated endoscopic submucosal dissection; no mention of death or outcome other than recovery.

Fig 2 Endoscopy-associated aspiration noted in literature search. GI, gastrointestinal; ICU, intensive care unit; PEG, percutaneous endoscopic gastrostomy; ARDS, Acute respiratory distress syndrome.

**Table 1** Reported instances of aspiration during procedures other than endoscopy ( $n=34$ ), sorted by outcome and then age. \*In the study by Mallory and colleagues,<sup>57</sup> this patient was inadvertently described as 5 yr old; the author provided the correction. ARDS, acute respiratory distress syndrome; CT, computed tomography; ICU, intensive care unit; MRI, magnetic resonance imaging

| Source                                                                                                                                 | Age       | Co-morbidities, risk factors                                                        | ASA status | Fasting status                           | Procedure                            | Provider            | Principal sedatives               | Interventions                | Outcome  |
|----------------------------------------------------------------------------------------------------------------------------------------|-----------|-------------------------------------------------------------------------------------|------------|------------------------------------------|--------------------------------------|---------------------|-----------------------------------|------------------------------|----------|
| Aspiration resulted in death Kelly and colleagues (2014) <sup>51</sup>                                                                 | 59 yr     | Solid organ transplant, advanced oesophageal cancer, cachexia                       | III        | Overnight                                | Colonoscopy                          | Gastroenterologist  | Midazolam 1 mg and fentanyl 25 µg | Bronchoscopy; death next day | Death    |
| Recovery, but intubation required Couloures and colleagues (2011), <sup>52</sup> Beach and colleagues (2016) <sup>8</sup>              | 10 months | Neurological deficit                                                                | II         | 6 h solids and liquids                   | MRI scan                             | Anaesthetist        | Propofol                          | Intubation                   | Recovery |
| Agostoni and colleagues (2011) <sup>34</sup>                                                                                           | 57 yr     | Colon cancer, liver metastases, cachexia                                            | II         | 6 h solids and liquids; 2 h clear fluids | Colonoscopy                          | Anaesthetist        | Propofol                          | Intubation                   | Recovery |
| Cheung and colleagues (2007) <sup>53</sup>                                                                                             | 65 yr     | Inebriation                                                                         | II         | 6 h solids and liquids                   | Fracture reduction                   | Orthopaedist        | Propofol                          | 12 h mechanical ventilation  | Recovery |
| Taylor and colleagues (2011) <sup>54</sup>                                                                                             | 83 yr     | Hiatus hernia                                                                       | ?          | 24 h solids and liquids                  | Hip relocation                       | Emergency physician | Propofol 50 mg and fentanyl 50 µg | Intubation and 2 days in ICU | Recovery |
| Recovery without intubation Babi and colleagues (2015) <sup>55</sup>                                                                   | 16 months | None                                                                                | I          | 4 h solids and liquids                   | Facial laceration                    | Emergency physician | Nitrous oxide                     | Unplanned 1 night admission  | Recovery |
| Kamat and colleagues (2015) <sup>39</sup>                                                                                              | 24 months | Haematology/oncology                                                                | III        | 8 h solids; 2 h liquids                  | lumbar puncture (LP) and bone marrow | Intensivist         | Propofol                          | None                         | Recovery |
| Srinivasan and colleagues (2012) <sup>56</sup>                                                                                         | 25 months | ?                                                                                   | I          | 6 h solids and liquids; 2 h clear fluids | MRI scan                             | Intensivist         | Propofol                          | Unplanned 1 night admission  | Recovery |
| Couloures and colleagues (2011), <sup>52</sup> Beach and colleagues (2016) <sup>8</sup>                                                | 26 months | Dehydration                                                                         | II         | 8 h solids and liquids                   | Central line                         | Intensivist         | Propofol                          | No intubation                | Recovery |
| Kamat and colleagues (2015) <sup>39</sup>                                                                                              | 26 months | Metabolic/genetic                                                                   | II         | 8 h solids and liquids                   | Surgical procedure                   | Intensivist         | Propofol                          | No intubation                | Recovery |
| Srinivasan and colleagues (2012) <sup>56</sup>                                                                                         | 26 months | Optic glioma, hydrocephalus, ventriculoperitoneal (VP) shunt, ex-30 weeks premature | III        | 6 h solids and liquids; 2 h clear fluids | MRI scan                             | Intensivist         | Propofol                          | Unplanned 1 night admission  | Recovery |
| Cravero and colleagues (2009); <sup>7</sup> Mallory and colleagues (2011), <sup>57</sup> Couloures and colleagues (2011) <sup>52</sup> | 31 months | Seizure disorder                                                                    | I          | 6 h solids and liquids; 2 h clear fluids | MRI scan                             | Emergency physician | Propofol                          | None                         | Recovery |
| Couloures and colleagues (2011), <sup>52</sup> Beach and colleagues (2016) <sup>8</sup>                                                | 3 yr      | Leukaemia                                                                           | II         | 8 h solids and liquids                   | CT scan                              | Intensivist         | Propofol                          | No intubation                | Recovery |
| Kamat and colleagues (2015) <sup>39</sup>                                                                                              | 3 yr      | Haematology/oncology                                                                | II         | 8 h solids and liquids                   | LP and bone marrow                   | Intensivist         | Propofol                          | No intubation                | Recovery |
| Beach and colleagues (2016) <sup>8</sup>                                                                                               | 5 yr      | Brain tumour                                                                        | II         | 8 h solids and liquids; 4 h clear fluids | MRI scan                             | Intensivist         | Propofol                          | No intubation                | Recovery |

|                                                                                                                                                 |        |                                                                 |         |                                             |                        |                        |                                                                |                                                                |          |
|-------------------------------------------------------------------------------------------------------------------------------------------------|--------|-----------------------------------------------------------------|---------|---------------------------------------------|------------------------|------------------------|----------------------------------------------------------------|----------------------------------------------------------------|----------|
| Cravero and colleagues (2006, <sup>58</sup> 2009) <sup>7</sup>                                                                                  | 5 yr   | Visceral transplant, ex-<br>premature                           | II      | 8 h solids and liquids                      | Colonoscopy            | Intensivist            | Propofol                                                       | Unplanned<br>1 night<br>admission                              | Recovery |
| Kamat and colleagues (2015) <sup>39</sup>                                                                                                       | 5 yr   | Brain tumour                                                    | II      | 8 h solids; 6 h liquids                     | MRI                    | Intensivist            | Propofol                                                       | None                                                           | Recovery |
| Kamat and colleagues (2015), <sup>39</sup><br>Beach and colleagues (2016) <sup>8</sup>                                                          | 6 yr   | Renal failure                                                   | II      | 8 h solids and liquids;<br>2 h clear fluids | Renal biopsy           | Intensivist            | Propofol                                                       | No intubation                                                  | Recovery |
| Kamat and colleagues (2015), <sup>39</sup><br>Beach and colleagues (2016) <sup>8</sup>                                                          | 6 yr   | Leukaemia, upper respi-<br>ratory infection (URI)               | III     | 8 h solids and liquids;<br>4 h clear fluids | Bronchoscopy           | Intensivist            | Propofol                                                       | No intubation                                                  | Recovery |
| Cravero and colleagues (2009); <sup>7</sup><br>Couloures and colleagues<br>(2011) <sup>52</sup>                                                 | 10 yr  | Leukaemia                                                       | II      | 6 h solids and liquids                      | Lumbar puncture        | Anaesthetist           | Propofol                                                       | Unplanned<br>hospitalization                                   | Recovery |
| Cravero and colleagues (2009); <sup>7</sup><br>Mallory and colleagues (2011), <sup>57</sup><br>Couloures and colleagues<br>(2011) <sup>52</sup> | 10 yr* | Neurological work-up                                            | I       | 6 h solids and liquids;<br>4 h clear fluids | MRI scan               | Emergency<br>physician | Propofol                                                       | Unplanned<br>admission                                         | Recovery |
| Kamat and colleagues (2015), <sup>39</sup><br>Beach and colleagues (2016) <sup>8</sup>                                                          | 12 yr  | Gastrointestinal disease                                        | II      | 8 h solids and liquids;<br>4 h clear fluids | Bronchoscopy           | Intensivist            | Propofol                                                       | No intubation                                                  | Recovery |
| Kamat and colleagues (2015) <sup>39</sup>                                                                                                       | 14 yr  | Haematology/oncology                                            | III     | 6 h solids; 2 h liquids                     | LP and<br>chemotherapy | Intensivist            | Propofol                                                       | None                                                           | Recovery |
| Kamat and colleagues (2015), <sup>39</sup><br>Beach and colleagues (2016) <sup>8</sup>                                                          | 15 yr  | Lymphoma                                                        | III     | 8 h solids and liquids                      | Lumbar puncture        | Intensivist            | Propofol                                                       | No intubation                                                  | Recovery |
| Sanborn and colleagues (2005) <sup>59</sup>                                                                                                     | Child  | ?                                                               | I or II | Oral contrast; 8 h solids                   | Imaging                | Radiology nurse        | Pentobarbital                                                  | None required                                                  | Recovery |
| Sanborn and colleagues (2005) <sup>59</sup>                                                                                                     | Child  | ?                                                               | I or II | Oral contrast; 8 h solids                   | Imaging                | Radiology nurse        | Pentobarbital                                                  | None required                                                  | Recovery |
| Agostoni and colleagues (2011) <sup>34</sup>                                                                                                    | 40 yr  | None                                                            | I       | 6 h solids and liquids;<br>2 h clear fluids | Colonoscopy            | Anaesthetist           | Propofol                                                       | No intubation                                                  | Recovery |
| Agostoni and colleagues (2011) <sup>34</sup>                                                                                                    | 59 yr  | Lung cancer, liver<br>metastases                                | I       | 6 h solids and liquids;<br>2 h clear fluids | Colonoscopy            | Anaesthetist           | Propofol                                                       | No intubation                                                  | Recovery |
| Agostoni and colleagues (2011) <sup>34</sup>                                                                                                    | 61 yr  | Hypertension                                                    | II      | 6 h solids and liquids;<br>2 h clear fluids | Colonoscopy            | Anaesthetist           | Propofol                                                       | No intubation                                                  | Recovery |
| Thornley and colleagues (2016) <sup>60</sup>                                                                                                    | 65 yr  | Hiatus hernia, gastroe-<br>sophageal reflux dis-<br>ease (GERD) | ?       | 4 h solids and liquids                      | Colonoscopy            | Anaesthetist           | Propofol                                                       | No intubation                                                  | Recovery |
| Agostoni and colleagues (2011) <sup>34</sup>                                                                                                    | 76 yr  | Barrett's oesophagus,<br>GERD                                   | II      | 6 h solids and liquids;<br>2 h clear fluids | Colonoscopy            | Anaesthetist           | Propofol                                                       | No intubation                                                  | Recovery |
| Recovery, but intubation status unknown<br>Vespasiano and colleagues (2007) <sup>61</sup> Child<br>Outcome unavailable                          |        | ?                                                               | ?       | ?                                           | ?                      | Intensivist            | Propofol                                                       | ?                                                              | Recovery |
| Adenipekun and colleagues<br>(1998) <sup>62</sup>                                                                                               | Child  | Cancer                                                          | ?       | ?                                           | Radiotherapy           | Radiotherapist         | Diazepam, chlor-<br>promazine,<br>promethazine,<br>paraldehyde | Diazepam, chlor-<br>promazine,<br>promethazine,<br>paraldehyde | ?        |
| Adenipekun and colleagues<br>(1998) <sup>62</sup>                                                                                               | Child  | Cancer                                                          | ?       | ?                                           | Radiotherapy           | Radiotherapist         | Diazepam, chlor-<br>promazine,<br>promethazine,<br>paraldehyde | Diazepam, chlor-<br>promazine,<br>promethazine,<br>paraldehyde | ?        |

format does not permit us to determine the prevalence of aspiration or to establish risk factors quantitatively.

We identified 292 occurrences during gastrointestinal endoscopy and 34 during other procedures. Gastrointestinal endoscopy clearly entails higher risk, particularly in patients with serious underlying illness, active gastrointestinal bleeding, or both (Fig. 2). For this reason, it is common in most settings to perform such procedures under anaesthesia with airway protection. Four of the eight deaths observed during gastrointestinal endoscopy were in patients undergoing percutaneous endoscopic gastrostomy tube placement. It is unclear whether the apparent greater risk is attributable to the gastric insufflation required to perform the percutaneous endoscopic gastrostomy procedure, the substantial co-morbidities of the patients involved, or both.

The 34 identified non-endoscopic instances represent a spectrum of ages, procedures, underlying illness, and sedation providers (Table 1). We identified fewer reports of aspiration than anticipated, which probably reflects the appropriate skills and experience of the providers most frequently providing such sedation (i.e. anaesthetists or intensivists). Procedural sedation has been widespread for decades, spanning across ages, different sedation providers (physicians and non-physicians), the extremes of health conditions (ASA status), varied NBM conditions, and a wide range of procedures in different contexts. Procedural sedation is administered millions of times annually worldwide. Judging from the published literature, the incidence of aspiration is extremely rare.

In the non-endoscopic subset, it is noteworthy that we found only a single death, and then only in a moribund patient (Table 1). The four other patients who required intubation were also not healthy. We identified no ASA I or II patients who suffered death or permanent disability, and no ASA I patients who required intubation, suggesting a lower risk than is widely presumed among generally healthy patients undergoing procedural sedation.

The largest series identified in our review was that of Beach and colleagues,<sup>8</sup> in which 10 aspirations were noted during 139 142 paediatric procedural sedations (0.0072%). This prevalence is lower than that reported with general anaesthesia, with pooled studies from 1980–1999 noting a prevalence of 0.03%,<sup>20</sup> with later estimates slightly lower: 0.021% (22/102 425),<sup>63</sup> 0.020% (24/118 371),<sup>64</sup> and 0.014% (10/73 007).<sup>33</sup> Aspiration during monitored anaesthesia care has been reported as 0.015% (4/26 434).<sup>33</sup> Accordingly, the best available estimate of the aspiration risk with procedural sedation would appear to be approximately one-third to one-half that of operative anaesthesia. There are theoretical reasons why sedation should entail lesser risk, primarily the decreased frequency of active airway manipulation, the retention of protective airway reflexes as an intended sedation end point, the preferential selection of healthier patients excluding the extremes of age, the avoidance of emetogenic inhalation agents, and the brevity of the sedation required for these simpler procedures.<sup>19 20</sup>

Although the reporting of co-morbidities and aspiration risk factors<sup>19 20</sup> was uneven between reports and often vague, such co-morbidities and risk factors were found in the majority of aspiration occurrences (Table 1). Only two of 34 non-endoscopic patients were described as having no underlying medical conditions. Most patients were at the extremes of age, although this may simply reflect their greater need for medical services.

Aspiration during non-endoscopic procedures was noted in a variety of sedation providers (Table 1). Intensivists were disproportionately represented, probably reflecting the greater

underlying illness of their patient population and their greater contribution of observational data to the sedation literature.

The procedures and sedatives used (primarily propofol) reflect a predominant target of deep sedation, supporting the general assumption that this state presents a higher aspiration risk than moderate or mild sedation. Neuroimaging was also a frequently noted indication, and it is possible that elevated intracranial pressure might have been a contributing factor in some occurrences.

Although propofol is likely to be the most common procedural sedation agent used in most settings, ketamine remains a common first or second choice, particularly in children.<sup>58</sup> It is noteworthy that our only occurrence of ketamine-associated aspiration was in subdissociative doses as a secondary adjunct to propofol (Table 1). Ketamine is well known to preserve protective airway reflexes, and our review fails to counter the previous observation that, despite almost 50 yr of continual worldwide use, there are no documented reports—except in medically compromised neonates—of clinically significant aspiration when ketamine is used as the principal sedative.<sup>65</sup> Accordingly, dissociative sedation with ketamine may be an alternative in circumstances of heightened aspiration risk or concern, while recognizing its well-described disadvantages relative to propofol of prolonged recovery, vomiting, and recovery agitation.<sup>65</sup>

Fasting is widely regarded as essential to mitigate aspiration risk and is widely practised for elective sedation. However, large procedural sedation series (including one with 139 142 sedation events)<sup>8</sup> have failed to identify any relationship between fasting and aspiration or other adverse events.<sup>8 66–71</sup>

In our review, every patient with aspiration conformed to NBM guidelines; one exception could be considered in the two children who presented NBM and received oral magnetic resonance imaging contrast agent (Table 1). This administration of oral contrast agent for imaging has been a common practice for decades, and our finding of only two occurrences of aspiration in this setting, both without significant morbidity, supports the previous reports and current practice of accepting minimal to no additional risk from oral contrast materials.<sup>72–74</sup> If foregoing NBM were a clinically important risk factor for aspiration, as widely presumed, adverse events associated with such non-compliance would have been expected to be captured in our sample.

Many regard existing NBM requirements as unnecessarily strict.<sup>75 76</sup> Fasting is uncomfortable, particularly for children, for whom parents are often non-compliant,<sup>77</sup> and can promote dehydration and hypoglycaemia.<sup>78 79</sup> There is also evidence to suggest that prolonged fasting, by creating a state of unease, increases the risk of failed sedations.<sup>80</sup> There are a number of sedation settings in which preprocedural fasting is often overlooked or unenforced without reported problems, such as dentistry,<sup>81</sup> therapeutic abortions,<sup>82</sup> cardiac catheterization,<sup>83</sup> echocardiography,<sup>84</sup> and cataract surgery.<sup>85</sup> Likewise, emergency departments must of necessity sedate patients for urgent or emergent procedures despite the absence of fasting,<sup>19 20 66–69</sup> and one might reasonably expect that such patients would be disproportionately represented in our sample. The only two emergency department patients in our sample had both been fasted before their presentation, although one was inebriated. Although our data support the interpretation that current NBM guidelines have less impact than widely assumed, they do not suggest that fasting should be abandoned or that providers should pay any less attention to screening the preprocedural oral intake of their patients.

Can we predict aspiration? Gastrointestinal endoscopy clearly introduces greater risk, as does deep sedation as the targeted sedation depth. Healthy (i.e. ASA I) patients were uncommon in our non-endoscopic sample, and thus appear to be at particularly low risk.

This review does not suggest greater risk from specific sedation providers or from non-compliance with preprocedural fasting. Underlying illness does appear to be a risk factor (as expected and previously observed);<sup>8 19 20</sup> however, many of the medical conditions observed (Table 1) are common in patients requiring procedural sedation. Accordingly, aspiration appears largely idiosyncratic and unpredictable. There are likely to be other contributory factors that cannot be quantified in a review of our format, including the frequency and contribution of intraprocedural airway manipulations, such as forceful bag-and-mask ventilation for upper airway obstruction.

The principal limitation of our review is that it identified only the reported instances of aspiration, and not the sedation denominator such that aspiration prevalence could be estimated. Additionally, we could only access occurrences of aspiration reported in the medical literature, and thus cannot exclude the possibility of death or permanent disability complicating aspiration that went unreported in peer-reviewed journals. However, it is noteworthy that a compilation of anecdotal 'sedation disasters' failed to identify a single instance of associated aspiration during a 27 yr study period.<sup>86 87</sup>

A further limitation is that our report cannot provide insights into the experience and judgment of the providers. Although many of our patients were low risk, others were clearly not (e.g. active gastrointestinal bleeding, higher ASA physical status), and it is not clear why sedation was chosen in these latter circumstances rather than anaesthesia with airway protection. We believe that the aspiration-related morbidity and mortality in our present report can further inform such decision-making, and strongly supports the advisability of referring high-risk patients whenever possible for anaesthetic management.

The NBM guidelines differ between specialties and settings, and therefore we are unable to specify the fasting intervals for each report. Finally, we were limited by the details of these patients that either were originally reported or could be later identified by their authors.

## Conclusion

This systematic review identified rare occurrences of pulmonary aspiration complicating non-endoscopic procedural sedation, with full recovery being typical. There were no occurrences of aspiration in patients non-compliant with NBM criteria. Although diligent caution remains warranted, our data indicate that aspiration during procedural sedation appears rare, idiosyncratic, and typically benign.

## Authors' contributions

Formulation of study design: S.M.G., K.P.M., B.S.K.  
 Data acquisition and analysis, drafting of manuscript: S.M.G.  
 Critical revision of manuscript for important intellectual content: K.P.M., B.S.K.  
 Approval of the final version of the manuscript: S.M.G., K.P.M., B.S.K.

## Acknowledgements

We wish to thank Shanalee Tamares, MLIS for her expert assistance with the literature search, and the many authors who kindly invested the time to supply us with additional details about their reported occurrences of aspiration.

## Declaration of interest

None declared.

## References

1. Krauss B, Green SM. Procedural sedation and analgesia in children. *Lancet* 2006; **367**: 766–80
2. Krauss B, Green SM. Sedation and analgesia for procedures in children. *N Engl J Med* 2000; **342**: 938–45
3. Cote CJ, Wilson S; American Academy of Pediatrics; American Academy of Pediatric Dentistry. Guidelines for monitoring and management of pediatric patients before, during, and after sedation for diagnostic and therapeutic procedures: update 2016. *Pediatrics* 2016; **138**: e20161212
4. O'Connor RE, Sama A, Burton JH, et al. Procedural sedation and analgesia in the emergency department: recommendations for physician credentialing, privileging, and practise. *Ann Emerg Med* 2011; **58**: 365–70
5. American Society of Anesthesiologists Task Force on Sedation and Analgesia by Non-Anesthesiologists. Practice guidelines for sedation and analgesia by non-anesthesiologists. *Anesthesiology* 2002; **96**: 1004–17
6. Mason KP, Green SM, Piacevoli Q; International Sedation Task Force. Adverse event reporting tool to standardize the reporting and tracking of adverse events during procedural sedation: a consensus document from the World SIVA International Sedation Task Force. *Br J Anaesth* 2012; **108**: 13–20
7. Cravero J, Beach M, Blike G, Gallagher S, Hertzog J; Pediatric Sedation Research Consortium. The incidence and nature of adverse events during pediatric sedation/anaesthesia with propofol for procedures outside the operating room: a report from the pediatric sedation research consortium. *Anesth Analg* 2009; **108**: 795
8. Beach ML, Cohen DM, Gallagher SM, Cravero JP. Major adverse events and relationship to nil per os status in pediatric sedation/anaesthesia outside the operating room: a report of the Pediatric Sedation Research Consortium. *Anesthesiology* 2016; **124**: 80–8
9. Engelhardt T, Webster NR. Pulmonary aspiration of gastric contents in anaesthesia. *Br J Anaesth* 1999; **83**: 453–460
10. Olsson GL, Hallen B, Hambraeus-Jonzon K. Aspiration during anaesthesia: a computer-aided study in 185 358 anaesthetics. *Acta Anaesthesiol Scand* 1986; **30**: 84–92
11. Warner MA, Warner ME, Warner DO, Warner LO, Warner EJ. Perioperative pulmonary aspiration in infants and children. *Anesthesiology* 1999; **90**: 66–71
12. American Society of Anesthesiologists Committee. Practice guidelines for preoperative fasting and the use of pharmacologic agents to reduce the risk of pulmonary aspiration: application to healthy patients undergoing elective procedures: an updated report by the American Society of Anesthesiologists Committee on Standards and Practice Parameters. *Anesthesiology* 2011; **114**: 495–511



13. Smith I, Kranke P, Murat I, et al. Perioperative fasting in adults and children: guidelines from the European Society of Anaesthesiology. *Eur J Anaesthesiol* 2011; **28**: 556–69
14. Marik PE. Aspiration pneumonitis and aspiration pneumonia. *N Engl J Med* 2001; **344**: 665–71
15. Andersson H, Zarén B, Frykholm P. Low incidence of pulmonary aspiration in children allowed intake of clear fluids until called to the operating suite. *Paediatr Anaesth* 2015; **25**: 770–7
16. Walker RWM. Pulmonary aspiration in pediatric anesthetic practice in the UK: a prospective survey of specialist pediatric centers over a one-year period. *Paediatr Anaesth* 2013; **23**: 702–11
17. Kelly CJ, Walker RWM. Perioperative pulmonary aspiration is infrequent and low risk in pediatric anesthetic practice. *Paediatr Anaesth* 2015; **25**: 36–43
18. Tan Z, Lee SY. Pulmonary aspiration under GA: a 13-year audit in a tertiary pediatric unit. *Paediatr Anaesth* 2016; **26**: 547–52
19. Green SM, Roback MG, Miner JR, Burton JH, Krauss B. Fasting and emergency department procedural sedation and analgesia: a consensus-based clinical practice advisory. *Ann Emerg Med* 2007; **49**: 454–61
20. Green SM, Krauss B. Pulmonary aspiration risk during emergency department procedural sedation—an examination of the role of fasting and sedation depth. *Acad Emerg Med* 2002; **9**: 35–42
21. Stroup DF. Meta-analysis of observational studies in epidemiology. A proposal for reporting. *JAMA* 2000; **283**: 2008–12
22. Cooper GS, Kou TD, Rex DK. Complications following colonoscopy with anesthesia assistance: a population-based analysis. *JAMA Intern Med* 2013; **173**: 551–12
23. Robbertze R, Posner KL, Domino KB. Closed claims review of anesthesia for procedures outside the operating room. *Curr Opin Anaesthesiol* 2006; **19**: 436–42
24. Bhananker SM, Posner KL, Cheney FW, Caplan RA, Lee LA, Domino KB. Injury and liability associated with monitored anesthesia care: a closed claims analysis. *Anesthesiology* 2006; **104**: 228–34
25. Cook TM, Scott S, Mihai R. Litigation related to airway and respiratory complications of anaesthesia: an analysis of claims against the NHS in England 1995–2007. *Anaesthesia* 2010; **65**: 556–63
26. Chicka MC, Dembo JB, Mathu-Muju KR, Nash DA, Bush HM. Adverse events during pediatric dental anesthesia and sedation: a review of closed malpractice insurance claims. *Pediatr Dent* 2012; **34**: 231–8
27. Brown TW, McCarthy ML, Kelen GD, Levy F. An epidemiologic study of closed emergency department malpractice claims in a national database of physician malpractice insurers. *Acad Emerg Med* 2010; **17**: 553–60
28. Elshove-Bolk J, Simons M, Cremers J, van Vugt A, Burg M. A description of emergency department-related malpractice claims in The Netherlands: closed claims study 1993–2001. *Eur J Emerg Med* 2004; **11**: 247–50
29. Ayres L, Black C, Scheepers M, Shaw I. An audit to evaluate the safety and efficacy of percutaneous endoscopic gastrostomy placement in patients with learning disabilities. *Br J Learn Disabil* 2014; **43**: 201–7
30. Barbara DW, Olsen DA, Pulido JN, et al. Periprocedural management of 172 gastrointestinal endoscopies in patients with left ventricular assist devices. *ASAIO J* 2015; **61**: 670–5
31. Kawanishi K, Kato J, Toda N, et al. Risk factors for aspiration pneumonia after endoscopic hemostasis. *Digest Dis Sci* 2016; **61**: 835–40
32. Park CH, Kim H, Kang YA, et al. Risk factors and prognosis of pulmonary complications after endoscopic submucosal dissection for gastric neoplasia. *Digest Dis Sci* 2013; **58**: 540–6
33. Sakai T, Planinsic RM, Quinlan JJ, Handley LJ, Kim T-Y, Hilmi IA. The incidence and outcome of perioperative pulmonary aspiration in a university hospital: a 4-year retrospective analysis. *Anesth Analg* 2006; **103**: 941–7
34. Agostoni M, Fanti L, Gemma M, Pasculli N, Beretta L, Testoni PA. Adverse events during monitored anaesthesia care for GI endoscopy: an 8-year experience. *Gastrointest Endoscop* 2011; **74**: 266–75
35. Bosanko NC, Barrett D, Emm C, et al. The routine use of a flumazenil infusion following percutaneous endoscopic gastrostomy placement to reduce early post-procedure mortality. *J R Coll Physicians Edinb* 2010; **40**: 111–4
36. Byeon J-S, Mann NK, Jamil LH, Lo SK. Double balloon enteroscopy can be safely done in elderly patients with significant co-morbidities. *J Gastroenterol Hepatol* 2012; **27**: 1831–6
37. Friedrich K, Scholl SG, Beck S, et al. Respiratory complications in outpatient endoscopy with endoscopist-directed sedation. *J Gastrointest Liver Dis* 2014; **23**: 255–9
38. Hsieh T-C, Wu Y-C, Ding H-J, et al. Clinically unrecognized pulmonary aspiration during gastrointestinal endoscopy with sedation: a potential pitfall interfering the performance of <sup>18</sup>F-FDG PET for cancer screening. *Eur J Radiol* 2011; **80**: e510–5
39. Kamat PP, McCracken CE, Gillespie SE, et al. Pediatric critical care physician-administered procedural sedation using propofol: a report from the Pediatric Sedation Research Consortium Database. *Pediatr Crit Care Med* 2015; **16**: 11–20
40. Mao W, Wei XQ, Tao J, Zhen FP, Wen ZF, Wu B. The safety of combined sedation with propofol plus fentanyl for endoscopy screening and endoscopic variceal ligation in cirrhotic patients. *J Digest Dis* 2014; **15**: 124–30
41. Nayar DS, Guthrie WG, Goodman A, et al. Comparison of propofol deep sedation versus moderate sedation during endosonography. *Digest Dis Sci* 2010; **55**: 2537–44
42. Park CH, Min JH, Yoo Y-C, et al. Sedation methods can determine performance of endoscopic submucosal dissection in patients with gastric neoplasia. *Surg Endosc* 2013; **27**: 2760
43. Park WY, Shin Y-S, Lee SK, Kim SY, Lee TK, Choi YS. Bispectral index monitoring during anesthesiologist-directed propofol and remifentanyl sedation for endoscopic submucosal dissection: a prospective randomized controlled trial. *Yonsei Med J* 2014; **55**: 1421–9
44. Prout BJ, Metreweli C. Pulmonary aspiration after fibroendoscopy of the upper gastrointestinal tract. *Br Med J* 1972; **4**: 269–71
45. Tanaka S, Mitsui K, Tatsuguchi A, et al. Current status of double balloon endoscopy—indications, insertion route, sedation, complications, technical matters. *Gastrointest Endosc* 2007; **66**: S30–3
46. Thapa BR, Mehta S. Endoscopic sclerotherapy of esophageal varices in infants and children. *J Pediatr Gastroent Nutr* 1990; **10**: 430–4
47. Tohda G, Higashi S, Wakahara S, Morikawa M, Sakumoto H, Kane T. Propofol sedation during endoscopic procedures: safe and effective administration by registered nurses supervised by endoscopists. *Endoscopy* 2006; **38**: 360–7
48. Tohda G, Higashi S, Sakumoto H, Sumiyoshi K, Kane T. Efficacy and safety of nurse-administered propofol sedation

- during emergency upper endoscopy for gastrointestinal bleeding: a prospective study. *Endoscopy* 2006; **38**: 684–9
49. Walker J. Nurse-administered propofol sedation without anesthesia specialists in 9152 endoscopic cases in an ambulatory surgery center. *Am J Gastroenterol* 2003; **98**: 1744–50
  50. Yoo YC, Park CH, Shin S, Park Y, Lee SK, Min KT. A comparison of sedation protocols for gastric endoscopic submucosal dissection: moderate sedation with analgesic supplementation vs analgesia targeted light sedation. *Br J Anaesth* 2015; **115**: 84–8
  51. Kelly CR, Ihunnah C, Fischer M, et al. Fecal microbiota transplant for treatment of *Clostridium difficile* infection in immunocompromised patients. *Am J Gastroenterol* 2014; **109**: 1065–71
  52. Couloures KG, Beach M, Cravero JP, Monroe KK, Hertzog JH. Impact of provider specialty on pediatric procedural sedation complication rates. *Pediatrics* 2011; **127**: e1154–60
  53. Cheung KW, Watson M-L, Field S, Campbell SG. Aspiration pneumonitis requiring intubation after procedural sedation and analgesia: a case report. *Ann Emerg Med* 2007; **49**: 462–4
  54. Taylor DM, Bell A, Holdgate A, et al. Risk factors for sedation-related events during procedural sedation in the emergency department. *Emerg Med Australas* 2011; **23**: 466–73
  55. Babl FE, Grindlay J, Barrett MJ. Laryngospasm with apparent aspiration during sedation with nitrous oxide. *Ann Emerg Med* 2015; **66**: 475–8
  56. Srinivasan M, Turmelle M, Depalma LM, Mao J, Carlson DW. Procedural sedation for diagnostic imaging in children by pediatric hospitalists using propofol: analysis of the nature, frequency, and predictors of adverse events and interventions. *J Pediatr* 2012; **160**: 801–6.e1
  57. Mallory MD, Baxter AL, Yanosky DJ, Cravero JP; Pediatric Sedation Research Consortium. emergency physician-administered propofol sedation: a report on 25,433 sedations from the pediatric sedation research consortium. *Ann Emerg Med* 2011; **57**: 462–468.e1
  58. Cravero JP, Blike GT, Beach M, et al. Incidence and nature of adverse events during pediatric sedation/anaesthesia for procedures outside the operating room: report from the Pediatric Sedation Research Consortium. *Pediatrics* 2006; **118**: 1087–96
  59. Sanborn PA, Michna E, Zurakowski D, et al. Adverse cardiovascular and respiratory events during sedation of pediatric patients for imaging examinations. *Radiology* 2005; **237**: 288–94
  60. Thornley P. Efficiency and patient experience with propofol vs conventional sedation: a prospective study. *World J Gastrointest Endosc* 2016; **8**: 232–8
  61. Vespasiano M, Finkelstein M, Kurachek S. Propofol sedation: intensivists' experience with 7304 cases in a children's hospital. *Pediatrics* 2007; **120**: e1411–7
  62. Adenipekun A, Soyannwo OA, Amanor-Boadu SD, Campbell OB, Oyeseun AR. Complications following sedation of paediatric oncology patients undergoing radiotherapy. *West Afr J Med* 1998; **17**: 224–6
  63. Tan Z, Lee SY. Pulmonary aspiration under GA: a 13-year audit in a tertiary pediatric unit. *Paediatr Anaesth* 2016; **26**: 547–52
  64. Walker RWM. Pulmonary aspiration in pediatric anesthetic practise in the UK: a prospective survey of specialist pediatric centers over a one-year period. *Paediatr Anaesth* 2013; **23**: 702–11
  65. Green SM, Roback MG, Kennedy RM, Krauss B. Clinical practice guideline for emergency department ketamine dissociative sedation: 2011 update. *Ann Emerg Med* 2011; **57**: 449–61
  66. Treston G. Prolonged pre-procedure fasting time is unnecessary when using titrated intravenous ketamine for paediatric procedural sedation. *Emerg Med Australas* 2004; **16**: 145–150
  67. Babl FE, Puspitadewi A, Barnett P, et al. Preprocedural fasting state and adverse events in children receiving nitrous oxide for procedural sedation and analgesia. *Pediatr Emerg Care* 2005; **21**: 736–43
  68. Agrawal D, Manzi SF, Gupta R, Krauss B. Preprocedural fasting state and adverse events in children undergoing procedural sedation and analgesia in a pediatric emergency department. *Ann Emerg Med* 2003; **42**: 636–6
  69. Roback MG, Bajaj L, Wathen JE, Bothner J. Preprocedural fasting and adverse events in procedural sedation and analgesia in a pediatric emergency department: are they related? *Ann Emerg Med* 2004; **44**: 454–9
  70. Heistein LC, Ramaciotti C, Scott WA, et al. Chloral hydrate sedation for pediatric echocardiography: physiologic responses, adverse events, and risk factors. *Pediatrics* 2006; **117**: e434–41
  71. Hoffman GM, Nowakowski R, Troshynski TJ, et al. Risk reduction in pediatric procedural sedation by application of an AAP/ASA process mode. *Pediatrics* 2002; **109**: 236–43
  72. Ziegler MA, Fricke BL, Donnelly LF. Is administration of enteric contrast material safe before abdominal CT in children who require sedation? Experience with chloral hydrate and pentobarbital. *AJR Am J Roentgenol* 2003; **180**: 13–5
  73. Mahmoud M, McAuliffe J, Kim H-Y, et al. Oral contrast for abdominal computed tomography in children: the effects on gastric fluid volume. *Anesth Analg* 2010; **111**: 1252–8
  74. Søreide E, Eriksson LI, Hirlekar G, et al. Pre-operative fasting guidelines: an update. *Acta Anaesth Scand* 2005; **49**: 1041–7
  75. Ragg P. Let them drink! *Paediatr Anaesth* 2015; **25**: 762–3
  76. Ljungqvist O, Søreide E. Preoperative fasting. *Br J Surg* 2003; **90**: 400–6
  77. Beazley B, Bulka CM, Landsman IS, Ehrenfeld JM. Demographic predictors of NBM violations in elective pediatric surgery. *J Perianesth Nurs* 2016; **31**: 36–40
  78. Andersson H, Zarén B, Frykholm P. Low incidence of pulmonary aspiration in children allowed intake of clear fluids until called to the operating suite. *Paediatr Anaesth* 2015; **25**: 770–7
  79. Dennhardt N, Beck C, Huber D, et al. Impact of preoperative fasting times on blood glucose concentration, ketone bodies and acid-base balance in children younger than 36 months: a prospective observational study. *Eur J Anaesthesiol* 2015; **32**: 857–61
  80. Keidan I, Gozal D, Minuskin T, Weinberg M, Barkaly H, Augarten A. The effect of fasting practice on sedation with chloral hydrate. *Pediatr Emerg Care* 2004; **20**: 805–7
  81. McKenna G, Manton S. Pre-operative fasting for intravenous conscious sedation used in dental treatment: are conclusions based on relative risk management or evidence? *Br Dent J* 2008; **205**: 173–6
  82. Wiebe ER, Byczko B, Kaczorowski J, McLane AL. Can we safely avoid fasting before abortions with low-dose procedural

- sedation? A retrospective cohort chart review of anaesthesia-related complications in 47,748 abortions. *Contraception* 2012 **3**; 1–4
83. Hamid T, Aleem Q, Lau Y, et al. Pre-procedural fasting for coronary interventions: is it time to change practise? *Heart* 2014; **100**: 658–61
84. Ghaffar S, Haverland C, Ramaciotti C, Scott WA, Lemler MS. Sedation for pediatric echocardiography: evaluation of pre-procedure fasting guidelines. *J Am Soc Echocardiogr* 2002; **15**: 980–3
85. Sanmugasunderam S, Khalfan A. Is fasting required before cataract surgery? A retrospective review. *Can J Ophthalmol* 2009; **44**: 655–6
86. Cote CJ, Alderfer RJ, Notterman DA, et al. Sedation disasters: adverse drug reports in pediatrics—FDA, USP, and others [abstract]. *Anesthesiology* 1995; **83**: A1183
87. Cote CJ, Notterman DA, Karl HW, et al. Adverse sedation events in pediatrics: a critical incident analysis of contributing factors. *Pediatrics* 2000; **105**: 805–814

Handling editor: Jonathan Hardman
